# Supplementary material for: Reversible inhibition of lysine specific demethylase 1 is a novel anti-tumor strategy for poorly differentiated endometrial carcinoma
Source: PubMed Central journal article supplement (PMC4197342; doi:10.1186/1471-2407-14-752), 2014-10-09

**Figure S2**

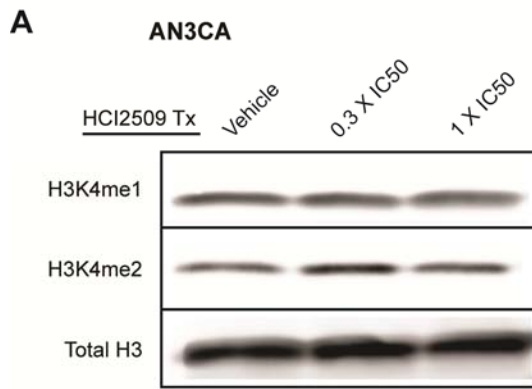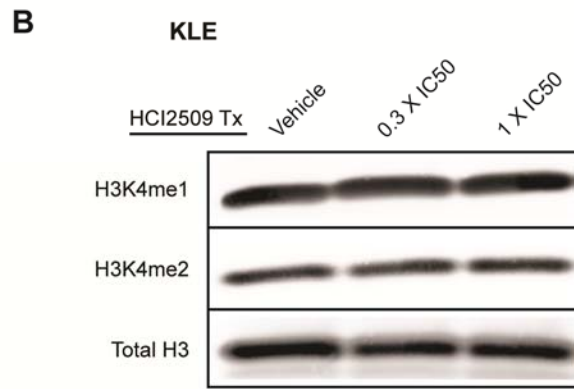

Supplement: 12885_2014_4932_MOESM1_ESM.pdf [file 12885_2014_4932_MOESM1_ESM.pdf]
