# Supplementary material for: Reversible inhibition of lysine specific demethylase 1 is a novel anti-tumor strategy for poorly differentiated endometrial carcinoma
Source: PubMed Central journal article supplement (PMC4197342; doi:10.1186/1471-2407-14-752), 2014-10-09

Figure S5

A Vehicle: Day 7

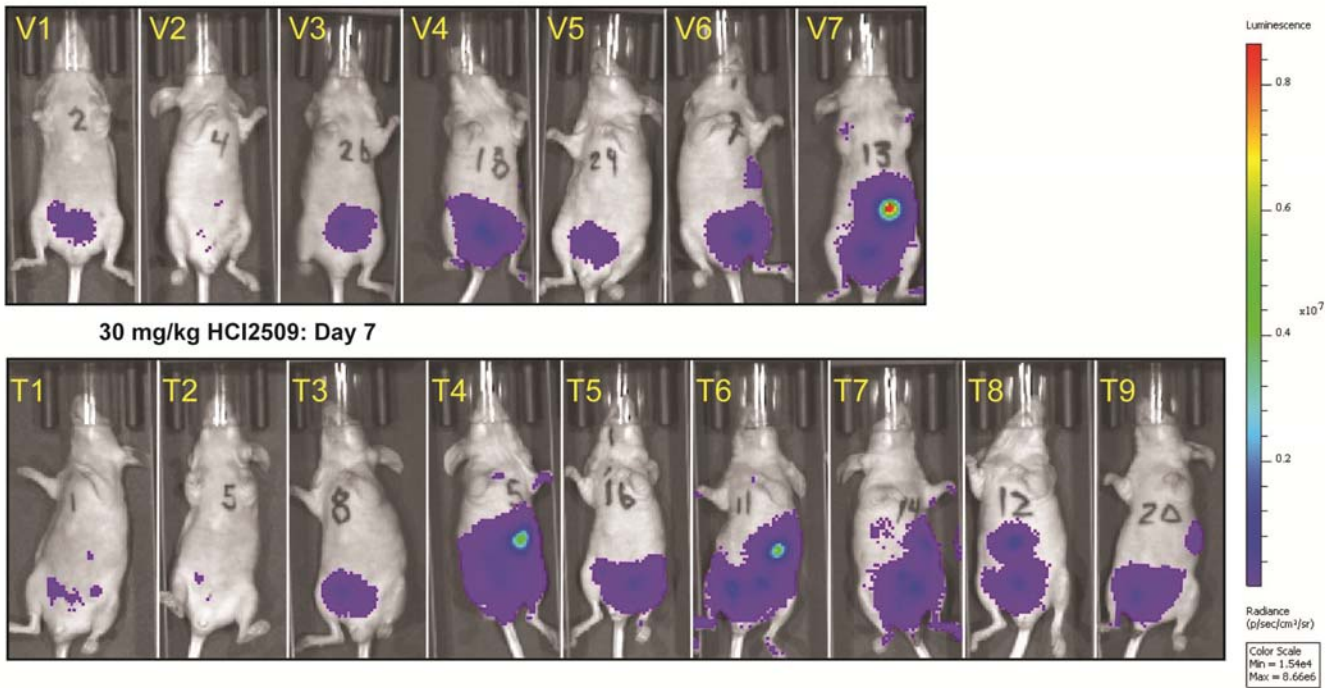

B Tumor distribution: Day 7

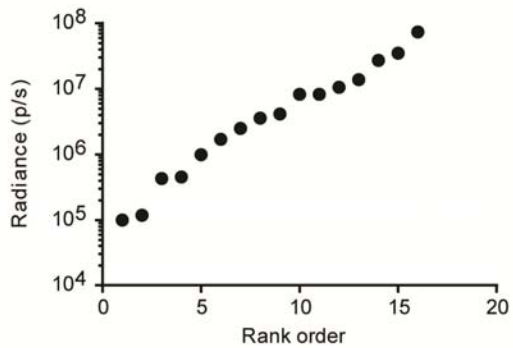

C Fisher's exact test

|         | Observed |            |    | Expected |            |   |    |
|---------|----------|------------|----|----------|------------|---|----|
|         | Tumor    | Regression |    | Tumor    | Regression |   |    |
| Vehicle | 7        | 0          | 7  | Vehicle  | 5          | 2 | 7  |
| HCl2509 | 4        | 5          | 9  | HCl2509  | 6          | 3 | 9  |
|         | 11       | 5          | 16 |          | 11         | 5 | 16 |

$p = 0.034$

D Tumor growth and body weight with untreated and unimplanted animals group

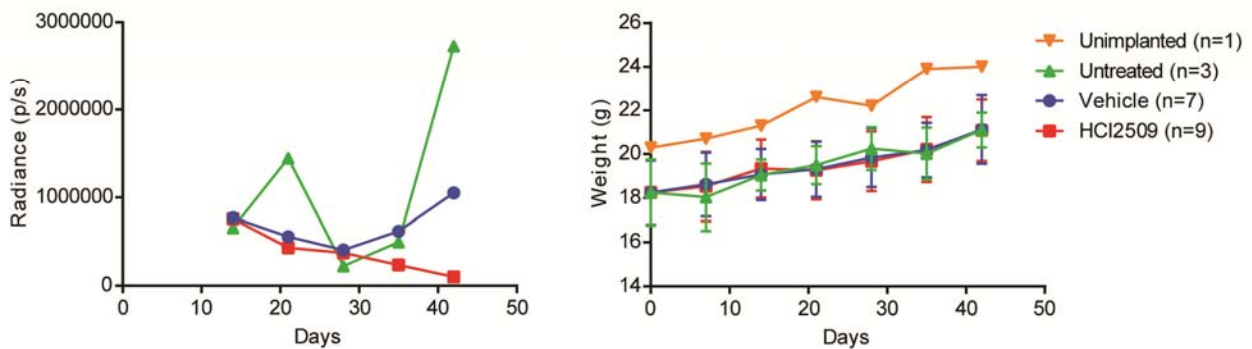

Supplement: 12885_2014_4932_MOESM4_ESM.pdf [file 12885_2014_4932_MOESM4_ESM.pdf]
